# Supplementary material
Source: Springer Nature journal article supplement (https://www.springermedizin.de/resource/supplementary/12985_2006_198_MOESM4_ESM.pdf/9607474)
Supplement: MOESM4 [file 9607474]

|         |                   |                             |            |            |            |     |
|---------|-------------------|-----------------------------|------------|------------|------------|-----|
| PERV-C  | YTSSGQFNY-        | -----                       | -LTWIRTGSP | KCSPSDLDYL | KISFTEKGKQ | 38  |
| PERV-A  | <u>PTSYNQFNYG</u> | HGRWKDWQQR                  | VQKDVRNKQI | SCHSLDLDYL | KISFTEKGKQ | 50  |
| PERV-AC | <u>PTSYNQFNYG</u> | HGRWKDWQQR                  | VQKDVRNKQI | SCHSLDLDYL | KISFTEKGKQ | 50  |
| PERV-C  | ENILKWVNGM        | SWGMYVYGGG                  | GKQPGSILTI | RLKIN-QLEP | PMAIGPNTVL | 87  |
| PERV-A  | ENIQKWVNGI        | SWGIVYYGGG                  | GRKKGSVLT  | RLRIETQMEP | PVAIGPNKGL | 100 |
| PERV-AC | ENIQKWVNGM        | SWGIVYYGGG                  | GRKKGSVLT  | RLKIN-QLEP | PMAIGPNTVL | 100 |
| PERV-C  | TGQRPPTQ--        | -- <u>GPGPS</u> - <u>SN</u> | <u>I</u>   |            |            | 132 |
| PERV-A  | AEQGPPIQEQ        | RPSNPSPDYN                  | T          |            |            | 150 |
| PERV-AC | TGQRPPTQ--        | -- <u>GPGPS</u> - <u>SN</u> | <u>I</u>   |            |            | 114 |
